# Supplementary material
Source: publisher figshare collection journal article supplement (https://acs.figshare.com/ndownloader/files/5741256)
Supplement: Supplementary file 1 [file 5741256]

data_GLOBAL


# 1. SUBMISSION DETAILS


_publ_contact_author_name  'Evans, P. Andrew'

_publ_contact_author_address

;

        Indiana University

        Department of Chemistry

        800 E. Kirkwood Ave.

        Bloomington, IN 47405-7102

        USA

;

_publ_contact_author_phone      '++ 812 855 7368'

_publ_contact_author_fax        '++ 812 855 8300'

_publ_contact_author_email      'paevans@indiana.edu'

_publ_requested_journal         'J. Am. Chem. Soc.'

_publ_requested_coeditor_name     ?


_publ_contact_letter

;

  paper 'in submission' for publication in J. Am. Chem. Soc.'

;


# 3. TITLE AND AUTHOR LIST


_publ_section_title

;

 Stereoselective Construction of Cyclic Ethers using a Tandem 
 Two-Component Etherification: Elucidation of the Role of 
 Bismuth Tribromide

;


loop_

 _publ_author_name

 _publ_author_address

       'Evans, P. Andrew'

;       Indiana University

        Department of Chemistry

        800 E. Kirkwood Ave.

        Bloomington, IN 47405-7102

        USA
;

       'Cui, Jian'

;       Indiana University

        Department of Chemistry

        800 E. Kirkwood Ave.

        Bloomington, IN 47405-7102

        USA

;

       'Gharpure, Santosh J.'

;       Indiana University

        Department of Chemistry

        800 E. Kirkwood Ave.

        Bloomington, IN 47405-7102

        USA
;

       'Hinkle, Robert J.'

;       Indiana University

        Department of Chemistry

        800 E. Kirkwood Ave.

        Bloomington, IN 47405-7102

        USA
;


#=======================================================================

data_03091 
 
_audit_creation_method            SHELXL-97 
_chemical_name_systematic 
; 
 ? 
; 
_chemical_name_common             ? 
_chemical_melting_point           ? 
_chemical_formula_moiety          ? 
_chemical_formula_sum 
 'C19 H25 N O6' 
_chemical_formula_weight          363.40 
 
loop_ 
 _atom_type_symbol 
 _atom_type_description 
 _atom_type_scat_dispersion_real 
 _atom_type_scat_dispersion_imag 
 _atom_type_scat_source 
 'O'  'O'   0.0106   0.0060 
 'International Tables Vol C Tables 4.2.6.8 and 6.1.1.4' 
 'N'  'N'   0.0061   0.0033 
 'International Tables Vol C Tables 4.2.6.8 and 6.1.1.4' 
 'C'  'C'   0.0033   0.0016 
 'International Tables Vol C Tables 4.2.6.8 and 6.1.1.4' 
 'H'  'H'   0.0000   0.0000 
 'International Tables Vol C Tables 4.2.6.8 and 6.1.1.4' 
 
_symmetry_cell_setting           'Monoclinic'
_symmetry_space_group_name_H-M   'P2(1)/c  '
 
loop_ 
 _symmetry_equiv_pos_as_xyz 
 'x, y, z' 
 '-x, y+1/2, -z+1/2' 
 '-x, -y, -z' 
 'x, -y-1/2, z-1/2' 
 
_cell_length_a                    6.9308(18) 
_cell_length_b                    7.6574(19) 
_cell_length_c                    33.874(9) 
_cell_angle_alpha                 90.00 
_cell_angle_beta                  92.563(6) 
_cell_angle_gamma                 90.00 
_cell_volume                      1796.0(8) 
_cell_formula_units_Z             4 
_cell_measurement_temperature     113(2) 
_cell_measurement_reflns_used     973
_cell_measurement_theta_min        2.41
_cell_measurement_theta_max       27.53
 
_exptl_crystal_description       'thin plate'
_exptl_crystal_colour            'colorless'
_exptl_crystal_size_max           0.50 
_exptl_crystal_size_mid           0.30 
_exptl_crystal_size_min           0.09 
_exptl_crystal_density_meas       ? 
_exptl_crystal_density_diffrn     1.344 
_exptl_crystal_density_method     'not measured' 
_exptl_crystal_F_000              776 
_exptl_absorpt_coefficient_mu     0.100 
_exptl_absorpt_correction_type    'multi-scans' 
_exptl_absorpt_correction_T_min   0.9517 
_exptl_absorpt_correction_T_max   0.9911 
_exptl_absorpt_process_details    'SADABS'
 
_exptl_special_details 
; 
 ? 
; 
 
_diffrn_ambient_temperature       113(2) 
_diffrn_radiation_wavelength      0.71073 
_diffrn_radiation_type            MoK\a 
_diffrn_radiation_source          'fine-focus sealed tube' 
_diffrn_radiation_monochromator   graphite 
_diffrn_measurement_details
 '   0.30 degree frames measured for 5 seconds each' 
_diffrn_measurement_method        '\w scans' 
_diffrn_measurement_device        'three-circle goniometer with fixed chi' 
_diffrn_measurement_device_type   'Bruker Platform goniometer' 
_diffrn_detector                  'CCD area detector' 
_diffrn_detector_type             'Bruker SMART 6000' 
_diffrn_detector_area_resol_mean  44.52
_diffrn_standards_decay_%         0.0 
_diffrn_reflns_number             38263 
_diffrn_reflns_av_R_equivalents   0.0425 
_diffrn_reflns_av_sigmaI/netI     0.0226 
_diffrn_reflns_limit_h_min        -9 
_diffrn_reflns_limit_h_max        9 
_diffrn_reflns_limit_k_min        -9 
_diffrn_reflns_limit_k_max        9 
_diffrn_reflns_limit_l_min        -44 
_diffrn_reflns_limit_l_max        43 
_diffrn_reflns_theta_min          2.41 
_diffrn_reflns_theta_max          27.57 
_reflns_number_total              4130 
_reflns_number_gt                 3504 
_reflns_threshold_expression      >2sigma(I) 
 
_computing_data_collection        'SMART (Bruker, 1999)' 
_computing_cell_refinement        'SAINT (Bruker, 1999)' 
_computing_data_reduction         'SAINT (Bruker, 1999), XTEL (local)' 
_computing_structure_solution     'SHELXS-97 (Sheldrick, 1990)' 
_computing_structure_refinement   'SHELXL-97 (Sheldrick, 1997)' 
_computing_molecular_graphics     ? 
_computing_publication_material   ? 
 
_refine_special_details 
; 
 Refinement of F^2^ against ALL reflections.  The weighted R-factor wR and 
 goodness of fit S are based on F^2^, conventional R-factors R are based 
 on F, with F set to zero for negative F^2^. The threshold expression of 
 F^2^ > 2sigma(F^2^) is used only for calculating R-factors(gt) etc. and is 
 not relevant to the choice of reflections for refinement.  R-factors based 
 on F^2^ are statistically about twice as large as those based on F, and R- 
 factors based on ALL data will be even larger. 
; 
 
_refine_ls_structure_factor_coef  Fsqd  
_refine_ls_matrix_type            full 
_refine_ls_weighting_scheme       calc  
_refine_ls_weighting_details 
 'calc w=1/[\s^2^(Fo^2^)+(0.0234P)^2^+2.6253P] where P=(Fo^2^+2Fc^2^)/3' 
_atom_sites_solution_primary      direct 
_atom_sites_solution_secondary    difmap 
_atom_sites_solution_hydrogens    geom 
_refine_ls_hydrogen_treatment     mixed 
_refine_ls_extinction_method      none 
_refine_ls_extinction_coef        ? 
_refine_ls_number_reflns          4130 
_refine_ls_number_parameters      335 
_refine_ls_number_restraints      0 
_refine_ls_R_factor_all           0.0656 
_refine_ls_R_factor_gt            0.0555 
_refine_ls_wR_factor_ref          0.1296 
_refine_ls_wR_factor_gt           0.1249 
_refine_ls_goodness_of_fit_ref    1.171 
_refine_ls_restrained_S_all       1.171 
_refine_ls_shift/su_max           0.001 
_refine_ls_shift/su_mean          0.000 
 
loop_ 
 _atom_site_label 
 _atom_site_type_symbol 
 _atom_site_fract_x 
 _atom_site_fract_y 
 _atom_site_fract_z 
 _atom_site_U_iso_or_equiv 
 _atom_site_adp_type 
 _atom_site_occupancy 
 _atom_site_symmetry_multiplicity 
 _atom_site_calc_flag 
 _atom_site_refinement_flags 
 _atom_site_disorder_assembly 
 _atom_site_disorder_group 
C1 C 0.7600(3) 0.8342(3) 0.16581(6) 0.0224(4) Uani 1 1 d . . . 
C2 C 0.6306(3) 0.8558(3) 0.20058(6) 0.0242(5) Uani 1 1 d . . . 
C3 C 0.6320(3) 1.0470(3) 0.21297(6) 0.0238(5) Uani 1 1 d . . . 
O4 O 0.8260(2) 1.0817(2) 0.22614(5) 0.0270(4) Uani 1 1 d . . . 
C5 C 0.8588(4) 1.2595(3) 0.23726(7) 0.0311(5) Uani 1 1 d . . . 
C6 C 0.8165(4) 1.3791(3) 0.20246(7) 0.0311(5) Uani 1 1 d . . . 
C7 C 0.6073(4) 1.3560(3) 0.18770(7) 0.0295(5) Uani 1 1 d . . . 
C8 C 0.5591(3) 1.1644(3) 0.17867(6) 0.0228(4) Uani 1 1 d . . . 
C9 C 0.3391(4) 1.1462(4) 0.17214(7) 0.0303(5) Uani 1 1 d . . . 
O10 O 0.6579(2) 1.12881(18) 0.14312(4) 0.0209(3) Uani 1 1 d . . . 
C11 C 0.6977(3) 0.9514(3) 0.13085(6) 0.0192(4) Uani 1 1 d . . . 
C12 C 0.8667(3) 0.9723(3) 0.10400(7) 0.0247(5) Uani 1 1 d . . . 
C13 C 0.5231(3) 0.8703(3) 0.10791(6) 0.0219(4) Uani 1 1 d . . . 
C14 C 0.4283(3) 0.9928(3) 0.07772(6) 0.0225(4) Uani 1 1 d . . . 
O15 O 0.2954(2) 0.8980(2) 0.05065(4) 0.0218(3) Uani 1 1 d . . . 
C16 C 0.3782(3) 0.8145(3) 0.02128(6) 0.0195(4) Uani 1 1 d . . . 
O17 O 0.5505(2) 0.8084(2) 0.01715(5) 0.0259(3) Uani 1 1 d . . . 
C18 C 0.2336(3) 0.7313(3) -0.00677(6) 0.0180(4) Uani 1 1 d . . . 
C19 C 0.3019(3) 0.6299(3) -0.03717(6) 0.0209(4) Uani 1 1 d . . . 
C20 C 0.1747(3) 0.5579(3) -0.06542(6) 0.0211(4) Uani 1 1 d . . . 
C21 C -0.0204(3) 0.5872(3) -0.06200(6) 0.0190(4) Uani 1 1 d . . . 
C22 C -0.0934(3) 0.6849(3) -0.03175(6) 0.0193(4) Uani 1 1 d . . . 
C23 C 0.0352(3) 0.7581(3) -0.00391(6) 0.0187(4) Uani 1 1 d . . . 
N24 N -0.1562(3) 0.5113(2) -0.09197(5) 0.0226(4) Uani 1 1 d . . . 
O25 O -0.0915(2) 0.4361(2) -0.12018(5) 0.0350(4) Uani 1 1 d . . . 
O26 O -0.3300(2) 0.5289(2) -0.08739(5) 0.0332(4) Uani 1 1 d . . . 
H44 H 0.419(3) 0.835(3) 0.1258(7) 0.015(5) Uiso 1 1 d . . . 
H35 H 0.894(4) 1.341(4) 0.1794(8) 0.031(7) Uiso 1 1 d . . . 
H48 H 0.441(4) 0.611(3) -0.0395(7) 0.021(6) Uiso 1 1 d . . . 
H47 H 0.519(3) 1.052(3) 0.0621(7) 0.021(6) Uiso 1 1 d . . . 
H46 H 0.347(3) 1.073(3) 0.0896(6) 0.013(5) Uiso 1 1 d . . . 
H29 H 0.492(3) 0.823(3) 0.1933(7) 0.018(6) Uiso 1 1 d . . . 
H37 H 0.516(4) 1.400(4) 0.2088(9) 0.043(8) Uiso 1 1 d . . . 
H50 H -0.231(4) 0.704(3) -0.0293(7) 0.028(7) Uiso 1 1 d . . . 
H32 H 0.779(4) 1.283(3) 0.2608(8) 0.028(7) Uiso 1 1 d . . . 
H40 H 0.303(4) 1.028(4) 0.1638(8) 0.038(8) Uiso 1 1 d . . . 
H33 H 0.998(4) 1.265(4) 0.2464(9) 0.035(7) Uiso 1 1 d . . . 
H51 H -0.008(3) 0.823(3) 0.0175(7) 0.021(6) Uiso 1 1 d . . . 
H28 H 0.899(4) 0.865(3) 0.1741(7) 0.023(6) Uiso 1 1 d . . . 
H38 H 0.273(4) 1.177(3) 0.1961(8) 0.026(6) Uiso 1 1 d . . . 
H36 H 0.579(3) 1.423(3) 0.1629(7) 0.024(6) Uiso 1 1 d . . . 
H49 H 0.219(4) 0.490(4) -0.0863(8) 0.035(7) Uiso 1 1 d . . . 
H31 H 0.541(3) 1.065(3) 0.2352(7) 0.024(6) Uiso 1 1 d . . . 
H43 H 0.978(4) 1.032(3) 0.1190(8) 0.028(7) Uiso 1 1 d . . . 
H39 H 0.299(4) 1.231(3) 0.1507(8) 0.025(6) Uiso 1 1 d . . . 
H41 H 0.908(4) 0.855(4) 0.0948(8) 0.036(7) Uiso 1 1 d . . . 
H45 H 0.567(3) 0.770(3) 0.0944(7) 0.021(6) Uiso 1 1 d . . . 
H42 H 0.830(4) 1.039(3) 0.0807(8) 0.027(7) Uiso 1 1 d . . . 
H27 H 0.761(4) 0.715(4) 0.1564(8) 0.029(7) Uiso 1 1 d . . . 
H30 H 0.680(4) 0.784(4) 0.2237(8) 0.035(7) Uiso 1 1 d . . . 
H34 H 0.843(4) 1.490(4) 0.2104(9) 0.042(8) Uiso 1 1 d . . . 
 
loop_ 
 _atom_site_aniso_label 
 _atom_site_aniso_U_11 
 _atom_site_aniso_U_22 
 _atom_site_aniso_U_33 
 _atom_site_aniso_U_23 
 _atom_site_aniso_U_13 
 _atom_site_aniso_U_12 
C1 0.0278(11) 0.0171(10) 0.0221(10) 0.0003(8) -0.0002(8) 0.0043(8) 
C2 0.0326(12) 0.0207(11) 0.0194(10) 0.0047(8) -0.0001(9) -0.0003(9) 
C3 0.0286(11) 0.0244(11) 0.0187(10) 0.0010(8) 0.0034(8) 0.0023(9) 
O4 0.0333(9) 0.0203(8) 0.0264(8) -0.0014(6) -0.0078(7) 0.0027(6) 
C5 0.0392(14) 0.0245(12) 0.0287(12) -0.0069(10) -0.0083(10) 0.0010(10) 
C6 0.0436(14) 0.0178(11) 0.0312(12) -0.0042(9) -0.0074(11) -0.0007(10) 
C7 0.0433(14) 0.0199(11) 0.0249(11) -0.0032(9) -0.0025(10) 0.0083(10) 
C8 0.0251(11) 0.0213(11) 0.0221(10) -0.0006(8) 0.0007(8) 0.0048(8) 
C9 0.0284(12) 0.0357(14) 0.0270(12) -0.0030(10) 0.0014(9) 0.0088(10) 
O10 0.0284(8) 0.0147(7) 0.0196(7) 0.0000(6) 0.0017(6) 0.0016(6) 
C11 0.0237(10) 0.0155(9) 0.0185(9) -0.0003(8) 0.0018(8) 0.0029(8) 
C12 0.0256(11) 0.0259(11) 0.0226(11) 0.0018(9) 0.0028(9) 0.0032(9) 
C13 0.0264(11) 0.0175(10) 0.0217(10) -0.0011(8) 0.0000(8) -0.0005(8) 
C14 0.0237(11) 0.0202(10) 0.0231(10) -0.0017(8) -0.0050(8) -0.0004(9) 
O15 0.0210(7) 0.0242(8) 0.0200(7) -0.0035(6) -0.0010(6) -0.0002(6) 
C16 0.0223(10) 0.0175(10) 0.0186(9) 0.0025(8) -0.0003(8) 0.0013(8) 
O17 0.0188(7) 0.0302(9) 0.0285(8) -0.0032(7) -0.0003(6) 0.0002(6) 
C18 0.0193(10) 0.0165(9) 0.0181(9) 0.0034(7) 0.0004(7) 0.0006(8) 
C19 0.0178(10) 0.0193(10) 0.0260(10) 0.0006(8) 0.0038(8) 0.0011(8) 
C20 0.0233(10) 0.0178(10) 0.0227(10) -0.0024(8) 0.0052(8) -0.0002(8) 
C21 0.0209(10) 0.0144(9) 0.0215(10) 0.0007(8) 0.0000(8) -0.0027(7) 
C22 0.0188(10) 0.0176(10) 0.0217(10) 0.0027(8) 0.0019(8) 0.0019(8) 
C23 0.0205(10) 0.0175(10) 0.0182(9) 0.0006(8) 0.0032(8) 0.0022(8) 
N24 0.0252(9) 0.0176(9) 0.0247(9) -0.0007(7) -0.0003(7) -0.0004(7) 
O25 0.0327(9) 0.0423(10) 0.0299(9) -0.0157(8) 0.0003(7) 0.0015(8) 
O26 0.0200(8) 0.0391(10) 0.0405(10) -0.0141(8) 0.0001(7) -0.0016(7) 
 
_geom_special_details 
; 
 All esds (except the esd in the dihedral angle between two l.s. planes) 
 are estimated using the full covariance matrix.  The cell esds are taken 
 into account individually in the estimation of esds in distances, angles 
 and torsion angles; correlations between esds in cell parameters are only 
 used when they are defined by crystal symmetry.  An approximate (isotropic) 
 treatment of cell esds is used for estimating esds involving l.s. planes. 
; 
 
loop_ 
 _geom_bond_atom_site_label_1 
 _geom_bond_atom_site_label_2 
 _geom_bond_distance 
 _geom_bond_site_symmetry_2 
 _geom_bond_publ_flag 
C1 C2 1.521(3) . ? 
C1 C11 1.532(3) . ? 
C1 H28 1.02(2) . ? 
C1 H27 0.97(3) . ? 
C2 C3 1.522(3) . ? 
C2 H29 1.01(2) . ? 
C2 H30 1.01(3) . ? 
C3 O4 1.422(3) . ? 
C3 C8 1.537(3) . ? 
C3 H31 1.01(2) . ? 
O4 C5 1.428(3) . ? 
C5 C6 1.511(3) . ? 
C5 H32 1.01(3) . ? 
C5 H33 1.00(3) . ? 
C6 C7 1.523(4) . ? 
C6 H35 1.01(3) . ? 
C6 H34 0.91(3) . ? 
C7 C8 1.532(3) . ? 
C7 H37 1.03(3) . ? 
C7 H36 1.00(3) . ? 
C8 O10 1.438(3) . ? 
C8 C9 1.537(3) . ? 
C9 H40 0.98(3) . ? 
C9 H38 0.98(3) . ? 
C9 H39 1.00(3) . ? 
O10 C11 1.451(2) . ? 
C11 C12 1.523(3) . ? 
C11 C13 1.539(3) . ? 
C12 H43 1.02(3) . ? 
C12 H41 1.00(3) . ? 
C12 H42 0.96(3) . ? 
C13 C14 1.516(3) . ? 
C13 H44 1.00(2) . ? 
C13 H45 0.95(3) . ? 
C14 O15 1.463(2) . ? 
C14 H47 0.96(2) . ? 
C14 H46 0.94(2) . ? 
O15 C16 1.334(2) . ? 
C16 O17 1.209(3) . ? 
C16 C18 1.493(3) . ? 
C18 C19 1.389(3) . ? 
C18 C23 1.398(3) . ? 
C19 C20 1.386(3) . ? 
C19 H48 0.98(2) . ? 
C20 C21 1.380(3) . ? 
C20 H49 0.94(3) . ? 
C21 C22 1.383(3) . ? 
C21 N24 1.473(3) . ? 
C22 C23 1.387(3) . ? 
C22 H50 0.97(3) . ? 
C23 H51 0.94(2) . ? 
N24 O25 1.218(2) . ? 
N24 O26 1.229(2) . ? 
 
loop_ 
 _geom_angle_atom_site_label_1 
 _geom_angle_atom_site_label_2 
 _geom_angle_atom_site_label_3 
 _geom_angle 
 _geom_angle_site_symmetry_1 
 _geom_angle_site_symmetry_3 
 _geom_angle_publ_flag 
C2 C1 C11 112.28(18) . . ? 
C2 C1 H28 110.1(14) . . ? 
C11 C1 H28 107.9(14) . . ? 
C2 C1 H27 111.7(15) . . ? 
C11 C1 H27 107.6(15) . . ? 
H28 C1 H27 107(2) . . ? 
C1 C2 C3 108.74(18) . . ? 
C1 C2 H29 111.7(13) . . ? 
C3 C2 H29 107.3(14) . . ? 
C1 C2 H30 110.5(16) . . ? 
C3 C2 H30 108.2(16) . . ? 
H29 C2 H30 110(2) . . ? 
O4 C3 C2 105.11(18) . . ? 
O4 C3 C8 113.71(18) . . ? 
C2 C3 C8 110.88(18) . . ? 
O4 C3 H31 110.7(14) . . ? 
C2 C3 H31 109.7(15) . . ? 
C8 C3 H31 106.8(14) . . ? 
C3 O4 C5 113.48(18) . . ? 
O4 C5 C6 110.44(19) . . ? 
O4 C5 H32 107.1(15) . . ? 
C6 C5 H32 114.4(15) . . ? 
O4 C5 H33 105.4(16) . . ? 
C6 C5 H33 111.4(17) . . ? 
H32 C5 H33 108(2) . . ? 
C5 C6 C7 109.5(2) . . ? 
C5 C6 H35 109.6(15) . . ? 
C7 C6 H35 104.3(15) . . ? 
C5 C6 H34 107.9(19) . . ? 
C7 C6 H34 112.5(19) . . ? 
H35 C6 H34 113(2) . . ? 
C6 C7 C8 111.89(19) . . ? 
C6 C7 H37 109.9(16) . . ? 
C8 C7 H37 108.4(17) . . ? 
C6 C7 H36 111.4(14) . . ? 
C8 C7 H36 107.0(14) . . ? 
H37 C7 H36 108(2) . . ? 
O10 C8 C7 103.95(18) . . ? 
O10 C8 C9 111.64(18) . . ? 
C7 C8 C9 108.76(19) . . ? 
O10 C8 C3 111.67(17) . . ? 
C7 C8 C3 110.37(18) . . ? 
C9 C8 C3 110.26(19) . . ? 
C8 C9 H40 111.4(17) . . ? 
C8 C9 H38 110.9(15) . . ? 
H40 C9 H38 110(2) . . ? 
C8 C9 H39 106.8(14) . . ? 
H40 C9 H39 109(2) . . ? 
H38 C9 H39 109(2) . . ? 
C8 O10 C11 121.43(15) . . ? 
O10 C11 C12 103.53(16) . . ? 
O10 C11 C1 112.18(16) . . ? 
C12 C11 C1 108.98(18) . . ? 
O10 C11 C13 111.56(17) . . ? 
C12 C11 C13 110.42(17) . . ? 
C1 C11 C13 109.97(17) . . ? 
C11 C12 H43 109.7(15) . . ? 
C11 C12 H41 109.2(16) . . ? 
H43 C12 H41 110(2) . . ? 
C11 C12 H42 111.2(15) . . ? 
H43 C12 H42 110(2) . . ? 
H41 C12 H42 107(2) . . ? 
C14 C13 C11 113.46(18) . . ? 
C14 C13 H44 105.9(13) . . ? 
C11 C13 H44 112.0(13) . . ? 
C14 C13 H45 108.3(15) . . ? 
C11 C13 H45 107.9(14) . . ? 
H44 C13 H45 109(2) . . ? 
O15 C14 C13 110.97(17) . . ? 
O15 C14 H47 107.6(14) . . ? 
C13 C14 H47 113.1(15) . . ? 
O15 C14 H46 102.7(13) . . ? 
C13 C14 H46 111.6(14) . . ? 
H47 C14 H46 110(2) . . ? 
C16 O15 C14 115.18(16) . . ? 
O17 C16 O15 124.40(19) . . ? 
O17 C16 C18 123.25(19) . . ? 
O15 C16 C18 112.34(17) . . ? 
C19 C18 C23 120.14(19) . . ? 
C19 C18 C16 117.97(18) . . ? 
C23 C18 C16 121.85(18) . . ? 
C20 C19 C18 120.45(19) . . ? 
C20 C19 H48 118.7(14) . . ? 
C18 C19 H48 120.8(14) . . ? 
C21 C20 C19 118.17(19) . . ? 
C21 C20 H49 120.4(17) . . ? 
C19 C20 H49 121.4(17) . . ? 
C20 C21 C22 122.88(19) . . ? 
C20 C21 N24 118.42(18) . . ? 
C22 C21 N24 118.71(18) . . ? 
C21 C22 C23 118.48(19) . . ? 
C21 C22 H50 122.5(15) . . ? 
C23 C22 H50 119.0(15) . . ? 
C22 C23 C18 119.86(19) . . ? 
C22 C23 H51 121.5(15) . . ? 
C18 C23 H51 118.6(15) . . ? 
O25 N24 O26 123.25(19) . . ? 
O25 N24 C21 118.74(18) . . ? 
O26 N24 C21 118.00(17) . . ? 
 
loop_ 
 _geom_torsion_atom_site_label_1 
 _geom_torsion_atom_site_label_2 
 _geom_torsion_atom_site_label_3 
 _geom_torsion_atom_site_label_4 
 _geom_torsion 
 _geom_torsion_site_symmetry_1 
 _geom_torsion_site_symmetry_2 
 _geom_torsion_site_symmetry_3 
 _geom_torsion_site_symmetry_4 
 _geom_torsion_publ_flag 
C11 C1 C2 C3 -57.3(2) . . . . ? 
C1 C2 C3 O4 -63.9(2) . . . . ? 
C1 C2 C3 C8 59.4(2) . . . . ? 
C2 C3 O4 C5 176.96(18) . . . . ? 
C8 C3 O4 C5 55.5(2) . . . . ? 
C3 O4 C5 C6 -60.9(3) . . . . ? 
O4 C5 C6 C7 59.2(3) . . . . ? 
C5 C6 C7 C8 -53.8(3) . . . . ? 
C6 C7 C8 O10 -72.2(2) . . . . ? 
C6 C7 C8 C9 168.7(2) . . . . ? 
C6 C7 C8 C3 47.6(3) . . . . ? 
O4 C3 C8 O10 67.3(2) . . . . ? 
C2 C3 C8 O10 -50.9(2) . . . . ? 
O4 C3 C8 C7 -47.8(2) . . . . ? 
C2 C3 C8 C7 -166.02(19) . . . . ? 
O4 C3 C8 C9 -168.01(18) . . . . ? 
C2 C3 C8 C9 73.8(2) . . . . ? 
C7 C8 O10 C11 161.52(17) . . . . ? 
C9 C8 O10 C11 -81.4(2) . . . . ? 
C3 C8 O10 C11 42.5(3) . . . . ? 
C8 O10 C11 C12 -157.42(17) . . . . ? 
C8 O10 C11 C1 -40.1(2) . . . . ? 
C8 O10 C11 C13 83.8(2) . . . . ? 
C2 C1 C11 O10 46.2(2) . . . . ? 
C2 C1 C11 C12 160.23(19) . . . . ? 
C2 C1 C11 C13 -78.6(2) . . . . ? 
O10 C11 C13 C14 43.9(2) . . . . ? 
C12 C11 C13 C14 -70.7(2) . . . . ? 
C1 C11 C13 C14 169.05(18) . . . . ? 
C11 C13 C14 O15 166.44(17) . . . . ? 
C13 C14 O15 C16 -80.9(2) . . . . ? 
C14 O15 C16 O17 2.9(3) . . . . ? 
C14 O15 C16 C18 -175.97(16) . . . . ? 
O17 C16 C18 C19 5.5(3) . . . . ? 
O15 C16 C18 C19 -175.61(18) . . . . ? 
O17 C16 C18 C23 -172.1(2) . . . . ? 
O15 C16 C18 C23 6.7(3) . . . . ? 
C23 C18 C19 C20 1.5(3) . . . . ? 
C16 C18 C19 C20 -176.21(19) . . . . ? 
C18 C19 C20 C21 -1.1(3) . . . . ? 
C19 C20 C21 C22 0.0(3) . . . . ? 
C19 C20 C21 N24 179.89(18) . . . . ? 
C20 C21 C22 C23 0.8(3) . . . . ? 
N24 C21 C22 C23 -179.12(18) . . . . ? 
C21 C22 C23 C18 -0.4(3) . . . . ? 
C19 C18 C23 C22 -0.7(3) . . . . ? 
C16 C18 C23 C22 176.91(19) . . . . ? 
C20 C21 N24 O25 -5.1(3) . . . . ? 
C22 C21 N24 O25 174.7(2) . . . . ? 
C20 C21 N24 O26 175.6(2) . . . . ? 
C22 C21 N24 O26 -4.5(3) . . . . ? 
 
_diffrn_measured_fraction_theta_max    0.997 
_diffrn_reflns_theta_full              27.57 
_diffrn_measured_fraction_theta_full   0.997 
_refine_diff_density_max    0.346 
_refine_diff_density_min   -0.254 
_refine_diff_density_rms    0.055 
